# Supplementary material
Source: Elsevier journal article supplement (https://www.sciencedirect.com/science/article/pii/S0300289622004495)

## **IMAGEN CLÍNICA**

### **Hemoptisis y pseudoaneurisma aórtico torácico. A propósito de un caso**

**Autores: Carlos Sánchez Villar\*, Raúl Godoy Mayoral, Javier Cruz Ruiz**

**Institución: Complejo Hospitalario Universitario de Albacete. Servicio de Neumología. Código Postal: 02006**

**\*Autor de correspondencia:**

**Email: carlos.uclm@gmail.com**

Describimos el caso de un varón de 66 años, hipertenso y diabético mal controlado que acude a Urgencias por hemoptisis moderada de 50 ml, fiebre, dolor centrotorácico opresivo, continuo e irradiado hacia el cuello y disnea de reposo de escasas horas de evolución. Relata previamente dolor torácico y cifras tensionales elevadas hasta valores de 200/120 mmHg desde hace 7 días, además de disfagia a sólidos en las últimas 72 horas. En la radiografía de tórax se observa una condensación extensa en LSI con desviación traqueal hacia el lado contralateral. Se solicita angio-TAC torácico urgente con hallazgo de pseudoaneurisma de cayado aórtico de 4 x 3.5 cm aproximadamente, con una solución de continuidad de la pared lateral izquierda del mismo de 2 cm, asociando además un hematoma adyacente y hemorragia alveolar en LSI (Figura 1).

Se realizó intervención quirúrgica urgente con colocación de endoprótesis aórtica, falleciendo finalmente en Reanimación por un shock hipovolémico refractario secundario a un hemotórax izquierdo.

Los aneurismas de aorta torácica cursan habitualmente de forma asintomática, aunque si presentan rotura pueden llegar a constituir una urgencia vital<sup>1,2</sup>. En nuestro caso debutó con hemoptisis y hemorragia alveolar que se pudo diagnosticar gracias al Angio-TAC, a pesar de su fallecimiento.

## **Bibliografía**

1. Bernabeu E, García-Valentín A. Aneurismas del arco aórtico. Generalidades: epidemiología, manifestaciones clínicas y diagnóstico. Indicaciones de cirugía. Cirugía abierta. Cir Cardiovasc. 2015;22(5):253-257.
2. Carrión Valero F, Rodríguez Castro EM, Marín Pardo J. Hemoptisis amenazante en el aneurisma de aorta. A propósito de un caso con supervivencia prolongada. An. Med. Interna. 2002;19(2): 59-60.

Figura 1.

Imagen de radiografía de tórax con infiltrado alveolar en LSI (A). Imagen de Angio-TAC torácico con pseudoaneurisma roto con hemorragia alveolar en LSI (B). Imagen en 3 dimensiones reconstruida en la que se observa aorta torácica con pseudoaneurisma roto (C).

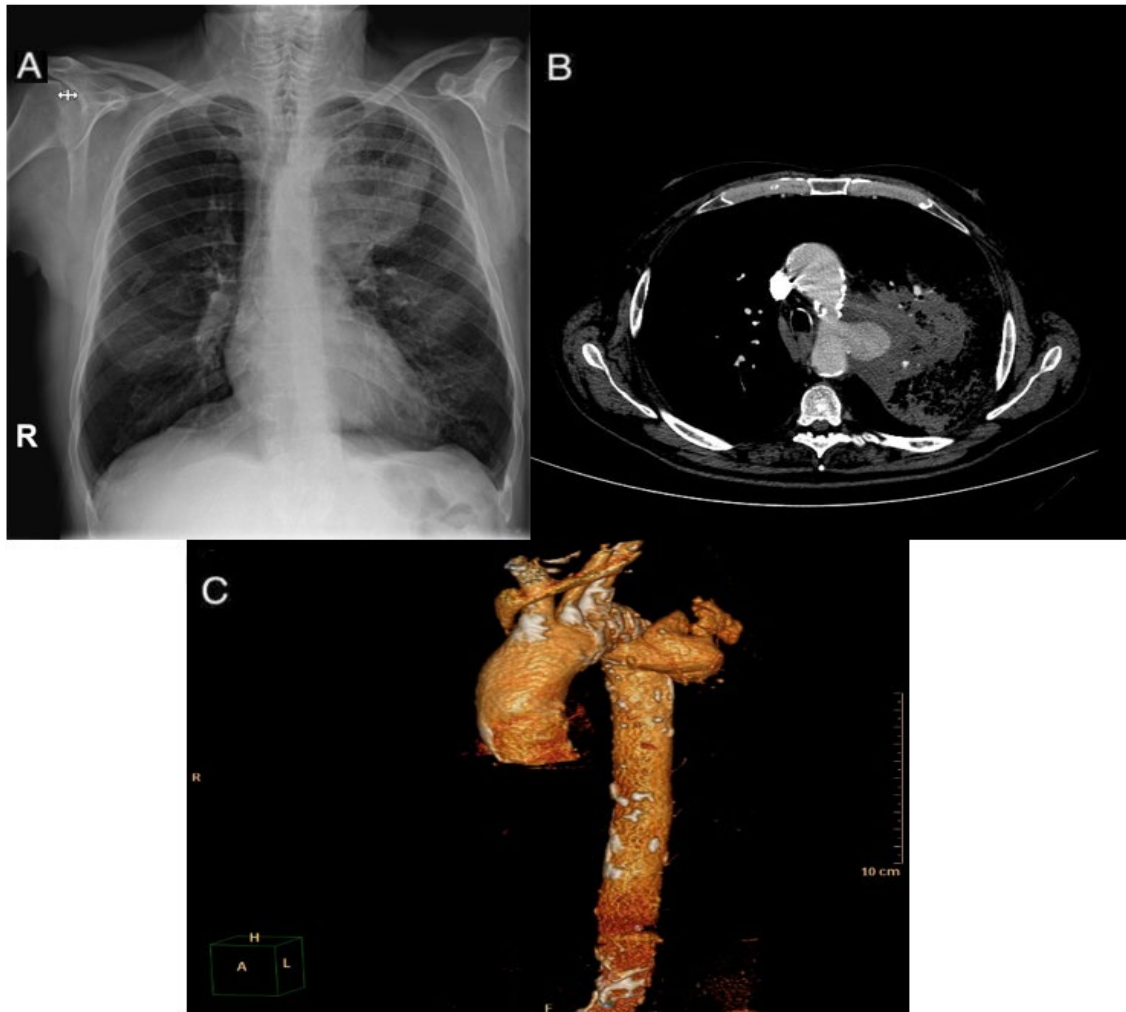

Supplement: mmc1 [file S0300289622004495:mmc1.pdf]
